# Supplementary material for: GPR30-mediated HMGB1 upregulation in CAFs induces autophagy and tamoxifen resistance in ERα-positive breast cancer cells
Source: Aging (Albany NY). 2021 Jun 28;13(12):16178–97. doi: 10.18632/aging.203145 (PMC8266353; doi:10.18632/aging.203145)
Supplement: Supplementary Figures [file aging-13-203145-s001.pdf]

[www.aging-us.com](http://www.aging-us.com)

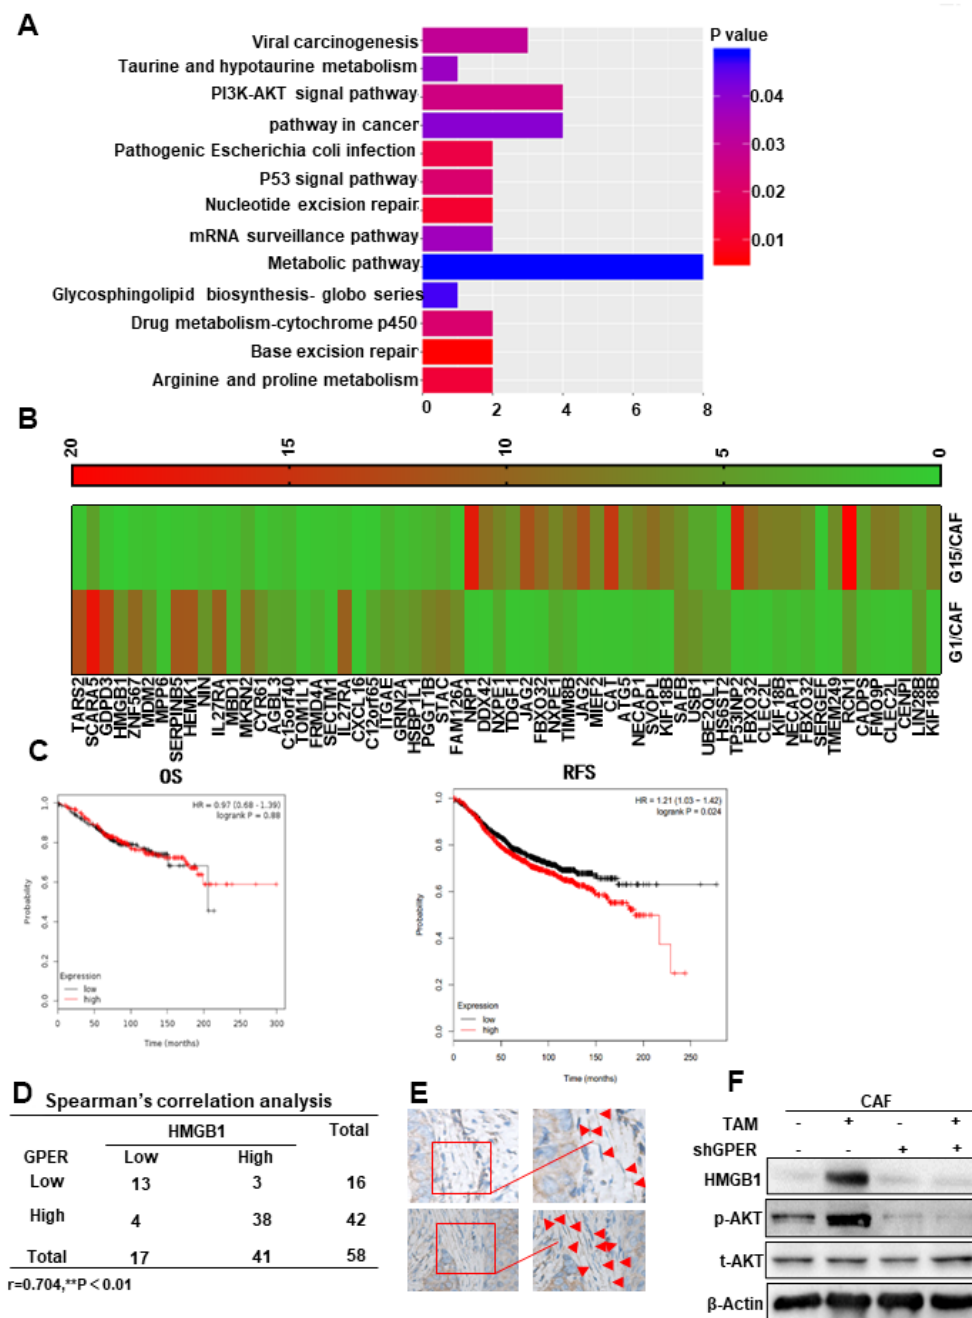

**Supplementary Figure 1. Related to Figure 2: HMGB1 expression in mRNA microarrays and its clinical significance.** (A) Heat-map of changed genes and cytokines in the G1 group compared with those in the group administered the combination of TAM and G15. Red and green indicate up- and downregulated genes, respectively. Fold changes > 1.5; P < 0.05, ctrl group: CAF cells without any treatment; TAM/G15 group: CAF cells pretreated with G15 for 30 min, and then treated with TAM; G1 group: CAF cells pretreated with G1 for 30 min. TAM group: CAF cells treated with TAM; \*\*P < 0.01, (n = 3). (B) KEGG signaling pathway prediction. (C) Online prediction of overall survival (OS) and relapse-free survival (RFS) of patients with breast cancer. Database: <http://kmplot.com/analysis/>. (D) Correlation between GPR30 and HMGB1 in ER-positive breast cancer tissues using SPSS22.0. (E) IHC for HMGB1 in serial sections of highly expressing GPR30 tissues. (F) Phosphorylation of AKT was altered under stimulation with TAM.

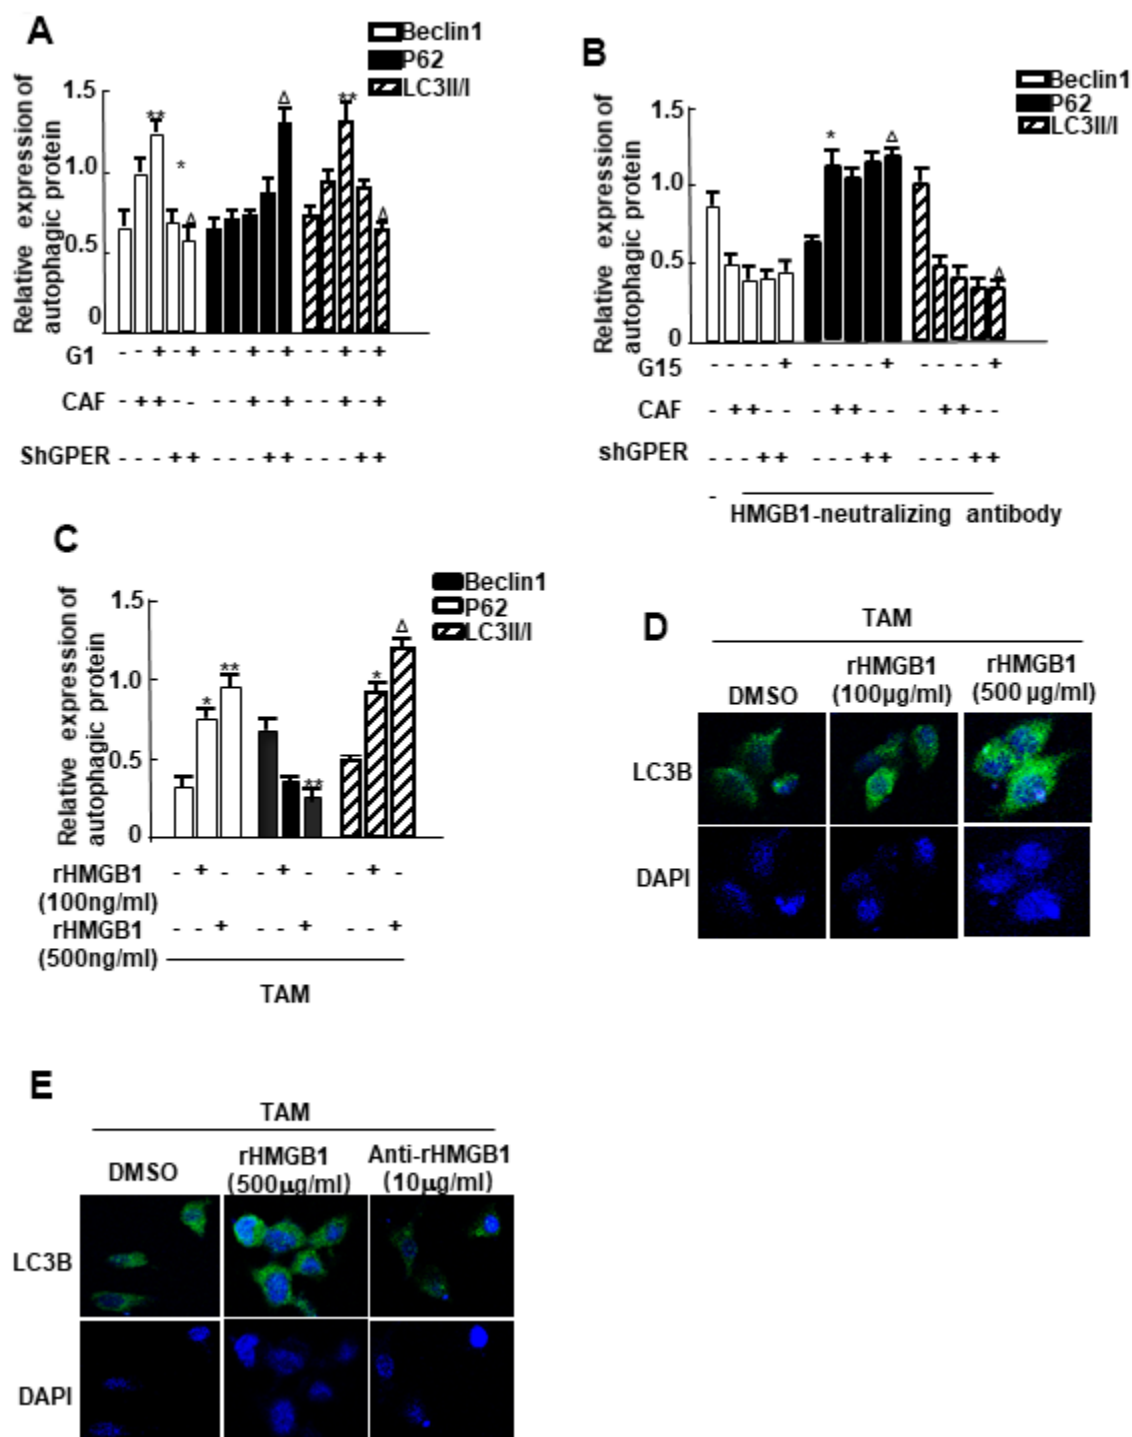

**Supplementary Figure 2. Related to Figure 4: Quantified data by Quantity one software and autophagosome formation.** (A–C) Quantification of the data of western blotting using the Quantity one software. (D, E) mGFP-LC3B expression vectors were transfected into MCF-7 cells cocultured with recombinant HMGB1 or anti-HMGB1 antibody. The numbers of LC3B puncta were evaluated under a fluorescence microscope.
